# Supplementary material for: How Much Variation Can One Ant Species Hold? Species Delimitation in the Crematogaster kelleri-Group in Madagascar
Source: PLoS One. 2013 Jul 9;8(7):e68082. doi: 10.1371/journal.pone.0068082 (PMC3706601; doi:10.1371/journal.pone.0068082)
Supplement: Table S1 — Full collection data of molecular voucher specimens. Voucher specimens, Genbank accession numbers and locality data of all specimens included in the molecular study. (XLSX) [file pone.0068082.s001.xlsx]

## Sheet: Collection data
Supplementary Table 1: Collection data of Crematogaster specimens included in the molecular study
Crematogasterspecies	voucher specimen	Genbank accession(s)	collector	country	locality	LatDD	LongDD	Located at
Nuclear dataset
hafahafa	CASENT0436545	LW Rh: KC514938; ArgK: KC514925; CAD: KC514931	B.L.Fisher	Madagascar	Parc National Montagne d'Ambre, 3.6 km 235° SW Joffreville, 925m	-12.5344	49.1795	CASC
hazolava	CASENT0058825	LW Rh: JQ326758; ArgK: JQ326528; CAD: JQ326643	B.L.Fisher	Madagascar	Forêt Ambatovy, 14.3 km 57° Moramanga, 1075m	-18.8508	48.32	CASC
hazolava	CASENT0151908	LW Rh: KC514936; ArgK: KC514923; CAD: KC514929	B.L.Fisher	Madagascar	Betaolana Forest, along Bekona River, 880m	-14.53	49.4404	CASC
hova-complex	CASENT0058827	LW Rh: JQ326688; ArgK: JQ326458; CAD: JQ326573	B.L.Fisher	Madagascar	Forêt Ambatovy, 14.3 km 57° Moramanga, 1075m	-18.8508	48.32	CASC
kelleri	CASENT0498885	LW Rh: KC514940; ArgK: KC544013; CAD: KC514933	B.L.Fisher	Madagascar	Forêt d'Ampondrabe, 26.3km 10° NNE Daraina, 175m	-12.97	49.7	CASC
kelleri	CASENT0109989	LW Rh: JQ326746; ArgK: JQ326516; CAD: JQ326631	B.L.Fisher	Madagascar	Ile Sainte Marie, Forêt Kalalao, 9.9 km 34° Ambodifotatra, 100m	-16.9225	49.8873	CASC
kelleri	CASENT0193255	LW Rh: KC514939; ArgK: KC514926; CAD: KC514932	B.B.Blaimer	Madagascar	RS Manongarivo, 6.95 km SW Antanambao, 330m	-13.9312	48.4524	BBBC
kelleri	CASENT0071672	LW Rh: KC514941; ArgK: KC514927; CAD: KC514934	B.L.Fisher	Madagascar	Réserve Speciale Manombo 24.5 km 228° Farafangana, 30m	-23.0158	47.719	CASC
kelleri	CASENT0129802	LW Rh: KC514942; ArgK: KC514928; CAD: KC514935	B.L.Fisher	Madagascar	Nosy Mangabe, 7.43 km S Maroantsetra, 5m	-15.4973	49.7622	CASC
kelleri	CASENT0193264	LW Rh: JN129957; ArgK: JN129921; CAD: JN129850	B.B.Blaimer	Madagascar	RS Manongarivo, 7 km SW Antanambao, 360m	-13.9314	48.4518	BBBC
madagascariensis	CASENT0193446	LW Rh: KC514937; ArgK: KC514924; CAD: KC514930	B.B.Blaimer	Madagascar	PN Andringitra, 16.3km Ambalamanenjana, 830m	-22.2268	47.0036	BBBC
madagascariensis	CASENT0193580	LW Rh: JQ326749; ArgK: JQ326519; CAD: JQ326634	B.L.Fisher	Madagascar	Forêt Ivohibe, 55.6km N Tolagnaro, 650m	-24.5617	47.2002	CASC
madecassa	CASENT0068164	LW Rh: JQ326949; ArgK: JQ326913; CAD: JQ326932	B.L.Fisher	Madagascar	Res. Ambodiriana, 4.8 km 306°Manompana, 125m	-16.6723	49.7012	CASC
ranavalonae	CASENT0193425	LW Rh: JN129942; ArgK: JN129891; CAD: JN129871	B.B.Blaimer	Madagascar	PN Andohahela/parcel 1, 4.7km E Tsimelahy, Tree1, 470m	-24.9456	46.6805	BBBC
tsisitsilo	CASENT0155969	LW Rh: KC526924; ArgK: KC526922; CAD: KC526923	B.L.Fisher	Madagascar	Réserve forestière Beanka, 50.2 km E Maintirano, 250m	-18.0265	44.0505	CASC
tsisitsilo	CASENT0120279	LW Rh: JQ326754; ArgK: JQ326524; CAD: JQ326639	B.L.Fisher	Madagascar	Maevatanana, 56m	-16.9482	46.8277	CASC
Mitochondrial dataset
hazolava	CASENT0143827	HQ925531	B.L.Fisher	Madagascar	Reserve Nationale Integrale Betampona, Betampona 35.1 km NW Toamasina, 550m	-17.916	49.202	CASC
hazolava	CASENT0144679	HQ925536	B.L.Fisher	Madagascar	Reserve Nationale Integrale Betampona, Betampona 35.1 km NW Toamasina, 525m	-17.92	49.2	CASC
hazolava	CASENT0162824	JN283308	B.L.Fisher et al.	Madagascar	Reserve Speciale Ambatovaky, Sandrangato river, 475m	-16.769	49.267	CASC
hazolava	CASENT0067736	KC501950	B.L.Fisher et al.	Madagascar	Reserve Betampona, Camp Vohitsivalana, 37.1 km 338° Toamasina, 520m	-17.887	49.202	CASC
hazolava	CASENT0058825	HM880703	B.L.Fisher	Madagascar	Foret Ambatovy, 14.3 km 57° Moramanga, 1075m	-18.851	48.32	CASC
hazolava	CASENT0161414	JN283245	B.L.Fisher et al.	Madagascar	Reserve Speciale Ambatovaky, Sandrangato river, 460m	-16.812	49.292	CASC
hova-complex	CASENT0193380	HQ547857	B.B.Blaimer	Madagascar	PN Andohahela/parcel 1: Col de Tanatana: 10.4km N Ezoambo, 550m	-24.737	46.84	BBBC
kelleri	CASENT0205555	KC501956	B.L.Fisher et al.	Madagascar	Makay Mts., 475m	-21.227	45.332	CASC
kelleri	CASENT0193265	HQ547830	B.B.Blaimer	Madagascar	RS Manongarivo: 7 km SW Antanambao, 360m	-13.931	48.452	BBBC
kelleri	CASENT0155953	JN283108	B.L.Fisher et al.	Madagascar	Reserve forestiere Beanka, 50.2 km E Maintirano, 250m	-18.026	44.051	CASC
kelleri	CASENT0156953	JN283150	B.L.Fisher et al.	Madagascar	Reserve forestiere Beanka, 52.7 km E Maintirano, 300m	-18.062	44.526	CASC
kelleri	CASENT0060482	KC501951	B.L.Fisher et al.	Madagascar	7.6 km 122° Kianjavato, Foret Classee Vatovavy, 175m	-21.4	47.94	CASC
kelleri	CASENT0156001	JN283112	B.L.Fisher et al.	Madagascar	Reserve forestiere Beanka, 52.7 km E Maintirano, 300m	-18.062	44.526	CASC
kelleri	CASENT0067043	KC501940	B.L.Fisher et al.	Madagascar	Foret d'Analava Mandrisy, 5.9 km 195° Antanambe, 10m	-16.486	49.847	CASC
kelleri	CASENT0138296	HM418769	B.L.Fisher et al.	Madagascar	Manerinerina, 76.6 km N Antsohihy, 247m	-14.107	48.11	CASC
kelleri	CASENT0144616	HQ925534	B.L.Fisher	Madagascar	Reserve Nationale Integrale Betampona, Betampona 35.1 km NW Toamasina, 525m	-17.92	49.2	CASC
kelleri	CASENT0193218	HQ547823	B.B.Blaimer	Madagascar	Antanambao: 23.9km N Ambanja, 55m	-13.886	48.498	BBBC
kelleri	CASENT0485320	HM418781	Fisher, Griswold et al.	Madagascar	Reserve Speciale d'Ambohijanahary, Foret d'Ankazotsihitafototra, 35.2 km 312° NW, 1050m	-18.267	45.407	CASC
kelleri	CASENT0107013	DQ176164	B.L.Fisher	Madagascar	Foret Ambato, 26.6 km 33° Ambanja, 150m	-13.464	48.552	CASC
kelleri	CASENT0071211	KC501946	B.L. Fisher et al.	Madagascar	Reserve Forestiere d'Agnalazaha, Mahabo, 42.9 km 215° Farafangana, 20m	-23.194	47.723	CASC
kelleri	CASENT0109989	KC501954	B.L.Fisher et al.	Madagascar	Ile Sainte Marie, Foret Kalalao, 9.9 km 34° Ambodifotatra, 100m	-16.922	49.887	CASC
kelleri	CASENT0144653	HQ925535	B.L.Fisher	Madagascar	Reserve Nationale Integrale Betampona, Betampona 35.1 km NW Toamasina, 525m	-17.92	49.2	CASC
kelleri	CASENT0063912	KC501945	B.L.Fisher et al.	Madagascar	Reserve Betampona, Camp Rendrirendry 34.1 km 332° Toamasina, 390m	-17.924	49.2	CASC
kelleri	CASENT0193264	HQ547829	B.B.Blaimer	Madagascar	RS Manongarivo: 7 km SW Antanambao, 360m	-13.931	48.452	BBBC
kelleri	CASENT0193223	HQ547824	B.B.Blaimer	Madagascar	Antanambao: 23.9km N Ambanja, 55m	-13.886	48.498	BBBC
kelleri	CASENT0472143	HM418776	Fisher, Griswold et al.	Madagascar	Foret de Tsimembo, 11.0 km 346° NNW Soatana, 50m	-18.995	44.444	CASC
kelleri	CASENT0067327	KC501939	B.L.Fisher et al.	Madagascar	Foret d'Analava Mandrisy, 5.9 km 195° Antanambe, 10m	-16.486	49.847	CASC
kelleri	CASENT0193297	HQ547837	B.B.Blaimer	Madagascar	RS Manongarivo: 6.88 km SW Antanambao, 285m	-13.93	48.453	BBBC
kelleri	CASENT0067236	KC501937	B.L.Fisher et al.	Madagascar	Ile Sainte Marie, Foret Kalalao, 9.9 km 34° Ambodifotatra, 100m	-16.922	49.887	CASC
kelleri	CASENT0209345	KC501938	B.L.Fisher et al.	Madagascar	Makay Mts., 490m	-21.223	45.325	CASC
kelleri	CASENT0067073	KC501936	B.L.Fisher et al.	Madagascar	Foret d'Analava Mandrisy, 5.9 km 195° Antanambe, 10m	-16.486	49.847	CASC
kelleri	CASENT0067248	KC501934	B.L.Fisher et al.	Madagascar	Ile Sainte Marie, Foret Kalalao, 9.9 km 34° Ambodifotatra, 100m	-16.922	49.887	CASC
kelleri	CASENT0067082	KC501935	B.L.Fisher et al.	Madagascar	Foret d'Analava Mandrisy, 5.9 km 195° Antanambe, 10m	-16.486	49.847	CASC
kelleri	CASENT0068153	KC501933	B.L.Fisher et al.	Madagascar	Res. Ambodiriana, 4.8 km 306°Manompana, along Manompana river, 125m	-16.672	49.701	CASC
kelleri	CASENT0068156	KC501932	B.L.Fisher et al.	Madagascar	Res. Ambodiriana, 4.8 km 306°Manompana, along Manompana river, 125m	-16.672	49.701	CASC
kelleri	CASENT0067394	KC501942	B.L.Fisher et al.	Madagascar	Analalava, 7.0 km 255° Mahavelona, 50m	-17.71	49.454	CASC
kelleri	CASENT0066729	KC501931	B.L.Fisher et al.	Madagascar	Ile Sainte Marie, Foret Ambohidena, 22.8 km 44° Ambodifotatra, 20m	-16.824	49.964	CASC
kelleri	CASENT0066843	KC501949	B.L.Fisher et al.	Madagascar	Ile Sainte Marie, Foret Kalalao, 9.9 km 34° Ambodifotatra, 100m	-16.922	49.887	CASC
kelleri	CASENT0065559	KC501930	B.L.Fisher et al.	Madagascar	Ile Sainte Marie, Foret Ambohidena, 22.8 km 44° Ambodifotatra, 20m	-16.824	49.964	CASC
kelleri	CASENT0156992	JN283154	B.L.Fisher et al.	Madagascar	Reserve forestiere Beanka, 50.2 km E Maintirano, 153m	-17.888	44.473	CASC
kelleri	CASENT0193253	HQ547827	B.B.Blaimer	Madagascar	RS Manongarivo: 6.95 km SW Antanambao, 330m	-13.931	48.452	BBBC
kelleri	CASENT0071704	KC501941	B.L. Fisher et al.	Madagascar	Reserve Speciale Manombo 24.5 km 228° Farafangana, 30m	-23.016	47.719	CASC
kelleri	CASENT0068946	KC501929	B.L.Fisher et al.	Madagascar	Ile Sainte Marie, Foret Ambohidena, 22.8 km 44° Ambodifotatra, 20m	-16.824	49.964	CASC
kelleri	CASENT0138586	HQ925525	B.L.Fisher	Madagascar	Reserve Nationale Integrale Betampona, Betampona 35.1 km NW Toamasina, 550m	-17.916	49.202	CASC
kelleri	CASENT0068959	KC501928	B.L.Fisher et al.	Madagascar	Ile Sainte Marie, Foret Ambohidena, 22.8 km 44° Ambodifotatra, 20m	-16.824	49.964	CASC
kelleri	CASENT0205564	KC501927	B.L.Fisher et al.	Madagascar	Makay Mts., 475m	-21.227	45.332	CASC
kelleri	CASENT0419676	HM879916	Fisher, Griswold et al.	Madagascar	Parc National Tsingy de Bemaraha, 2.5 km 62° ENE Bekopaka, Ankidrodroa River, 100m	-19.132	44.815	CASC
kelleri	CASENT0067431	KC501947	B.L.Fisher et al.	Madagascar	Ile Sainte Marie, Foret Ampanihy, 14.4 km 52° Ambodifotatra, 10m	-16.911	49.939	CASC
kelleri	CASENT0071212	KC501948	B.L. Fisher et al.	Madagascar	Reserve Forestiere d'Agnalazaha, Mahabo, 42.9 km 215° Farafangana, 20m	-23.194	47.723	CASC
kelleri	CASENT0071706	KC501926	B.L. Fisher et al.	Madagascar	Reserve Speciale Manombo 24.5 km 228° Farafangana, 30m	-23.016	47.719	CASC
kelleri	CASENT0492433	HM418785	Fisher, Griswold et al.	Madagascar	Mahavavy River, 6.2 km 145° SE Mitsinjo, 20m	-16.052	45.908	CASC
kelleri	CASENT0071596	KC501943	B.L. Fisher et al.	Madagascar	Reserve Forestiere d'Agnalazaha, Mahabo, 42.9 km 215° Farafangana, 20m	-23.194	47.723	CASC
kelleri	CASENT0107811	KC501944	B.L.Fisher	Madagascar	Foret Ambohimanga, 26.1 km 314° Mampikony, 250m	-15.963	47.438	CASC
kelleri	CASENT0067537	KC501925	B.L.Fisher et al.	Madagascar	Res. Ambodiriana, 4.8 km 306°Manompana, along Manompana river, 125m	-16.672	49.701	CASC
kelleri	CASENT0193247	HQ547826	B.B.Blaimer	Madagascar	RS Manongarivo: 6.88 km SW Antanambao, 320m	-13.931	48.452	BBBC
madagascariensis	CASENT0067352	KC501953	B.L.Fisher et al.	Madagascar	Parc National Mananara-Nord, 7.1 km 261° Antanambe, 225m	-16.455	49.788	CASC
madagascariensis	CASENT0193447	HQ547866	B.B.Blaimer	Madagascar	PN Andringitra: 16.3km Ambalamanenjana, 830m	-22.227	47.004	BBBC
madecassa	CASENT0068164	KC501955	B.L.Fisher et al.	Madagascar	Res. Ambodiriana, 4.8 km 306°Manompana, along Manompana river, 125m	-16.672	49.701	CASC
ranavalonae	CASENT0193531	HQ547877	B.B.Blaimer et al	Madagascar	RS Manongarivo: 6.95 km SW Antanambao, 330m	-13.931	48.452	BBBC
tavaratra	CASENT0436453	HM880707	Fisher, Griswold et al.	Madagascar	Foret d'Orangea, 3.6 km 128° SE Remena, 90m	-12.259	49.375	CASC
tsisitsilo	CASENT0155969	KC501952	B.L.Fisher et al.	Madagascar	Reserve forestiere Beanka, 50.2 km E Maintirano, 250m	-18.026	44.051	CASC
tsisitsilo	CASENT0048836	HM418724	B.L.Fisher	Madagascar	Foret d' Antsahabe, 11.4km 275° W Daraina, 550m	-13.212	49.557	CASC
tsisitsilo	CASENT0123008	HM418747	B.L.Fisher et al.	Madagascar	Ambondromamy, 64m	-16.438	47.158	CASC
tsisitsilo	CASENT0120279	HM418732	B.L.Fisher et al.	Madagascar	Maevatanana, 56m	-16.948	46.828	CASC
